# Supplementary material for: Seed-mediated synthesis of Au@PtCu nanostars with rich twin defects as efficient and stable electrocatalysts for methanol oxidation reaction
Source: Royal Society of Chemistry journal article supplement (doi:10.1039/c9ra06893g), 2019-01-01
Supplement: c9ra06893g1.pdf [file c9ra06893g1.pdf]

## Supporting Information

### **Seed-mediated synthesis of Au@PtCu nanostars with rich twin defects as efficient and stable electrocatalysts for methanol oxidation reaction**

Ting Bian<sup>a,d</sup>, Biao Sun<sup>a</sup>, Sai Luo<sup>c</sup>, Long Huang<sup>a</sup>, Shan Su<sup>b</sup>, Chunfeng Meng<sup>d</sup>,

Shichuan Su<sup>a,e</sup>, Aihua Yuan<sup>b,\*</sup>, Hui Zhang<sup>c,\*</sup>

*<sup>a</sup>School of Energy and Power Engineering, Jiangsu University of Science and Technology, Zhenjiang 212003, People's Republic of China*

*<sup>b</sup>School of Environmental and Chemical Engineering, Jiangsu University of Science and Technology, Zhenjiang 212003, People's Republic of China*

*<sup>c</sup>State Key Laboratory of Silicon Materials and School of Materials Science and Engineering, Zhejiang University, Hangzhou 310027, People's Republic of China*

*<sup>d</sup>School of Materials Science and Engineering, Jiangsu University of Science and Technology, Zhenjiang 212003, People's Republic of China*

*<sup>e</sup>Zhenjiang Key Laboratory of Marine Power Equipment Performance, Zhenjiang 212003, People's Republic of China*

\* Correspondence to: aihua.yuan@just.edu.cn, msezhanghui@zju.edu.cn

**Table S1.** ICP-AES data of the Au@PtCu decahedra, Au@Pt NPs and PtCu nanobranches.

| Sample No. | Precursors [mmol]     |                                     |                                      | Au/Pt/Cu atomic ratio | Surface chemical formula |
|------------|-----------------------|-------------------------------------|--------------------------------------|-----------------------|--------------------------|
|            | [HAuCl <sub>4</sub> ] | [H <sub>2</sub> PtCl <sub>6</sub> ] | [Cu(NO <sub>3</sub> ) <sub>2</sub> ] |                       |                          |
| 1          | 0.006                 | 0.02                                | 0.006                                | 1 : 2.29 : 0.72       | Pt <sub>3.2</sub> Cu     |
| 2          | 0.006                 | 0.02                                | 0.012                                | 1 : 3.53 : 1.55       | Pt <sub>2.3</sub> Cu     |
| 3          | 0.006                 | 0.02                                | 0.020                                | 1 : 2.72 : 2.43       | Pt <sub>1.1</sub> Cu     |
| 4          | 0.006                 | 0.02                                | 0.040                                | 1 : 3.76 : 3.23       | Pt <sub>1.2</sub> Cu     |
| 5          | 0.006                 | 0.02                                | 0.060                                | 1 : 3.27 : 2.79       | Pt <sub>1.2</sub> Cu     |
| 6          | 0.006                 | 0.02                                | 0.080                                | 1 : 3.31 : 2.86       | Pt <sub>1.2</sub> Cu     |
| 7          | 0.006                 | 0.02                                | 0.100                                | 1 : 2.71 : 2.25       | Pt <sub>1.2</sub> Cu     |
| 8          | 0.000                 | 0.02                                | 0.060                                | 0 : 1.00 : 0.84       | Pt <sub>1.2</sub> Cu     |
| 9          | 0.006                 | 0.02                                | 0.000                                | 1 : 2.96 : 0.00       | Au@Pt <sub>3</sub>       |

**Table S2.** ECSAs, specific activity, mass activity and I<sub>f</sub>/I<sub>b</sub> ratios of Au@PtCu decahedra, Au@Pt NPs, PtCu nanobranches, and commercial Pt/C catalysts.

| Sample                  | ECSA (m <sup>2</sup> /g <sub>Pt</sub> ) | Specific activity (mA cm <sup>-2</sup> ) | Mass activity (A mg <sup>-1</sup> ) | I <sub>f</sub> /I <sub>b</sub> |
|-------------------------|-----------------------------------------|------------------------------------------|-------------------------------------|--------------------------------|
| Au@Pt <sub>1.2</sub> Cu | 16.8                                    | 1.06                                     | 0.18                                | 2.0                            |
| Au@Pt <sub>3.2</sub> Cu | 15.3                                    | 0.53                                     | 0.08                                | 1.8                            |
| Au@Pt <sub>3</sub>      | 46.5                                    | 0.153                                    | 0.07                                | 2.1                            |
| Pt <sub>1.2</sub> Cu    | 11.7                                    | 0.267                                    | 0.03                                | 2.7                            |
| Pt/C                    | 63.1                                    | 0.18                                     | 0.11                                | 1.2                            |

**Table S3.** Comparison of Au@PtCu nanostars to recently reported catalysts for MOR.

| Electrode materials               | Specific activity<br>(times vs.<br>commercial Pt/C) | Mass activity<br>(times vs.<br>commercial Pt/C) | Reference |
|-----------------------------------|-----------------------------------------------------|-------------------------------------------------|-----------|
| Au@Pt <sub>1.2</sub> Cu nanostars | 5.9                                                 | 1.6                                             | this work |
| PtCu octahedra                    | 4.74                                                | 7.53                                            | 1         |
| Pd@Pt hexapods                    | 5.8                                                 | 2.6                                             | 2         |
| star-like PtCu/rGO NCs            | \                                                   | 3*                                              | 3         |
| PtCu NCs                          | 6.2                                                 | 2.37                                            | 4         |
| PtCu@TiO <sub>2</sub> NCs         | \                                                   | 1                                               | 5         |
| urchin-like PtCu NCs              | \                                                   | 1.5                                             | 6         |
| PtCu hexapod concave<br>NCs       | 2.5                                                 | \                                               | 7         |
| porous PtCu NCs                   | 9.8                                                 | 10.5                                            | 8         |

\* compared with Pt/rGO NCs

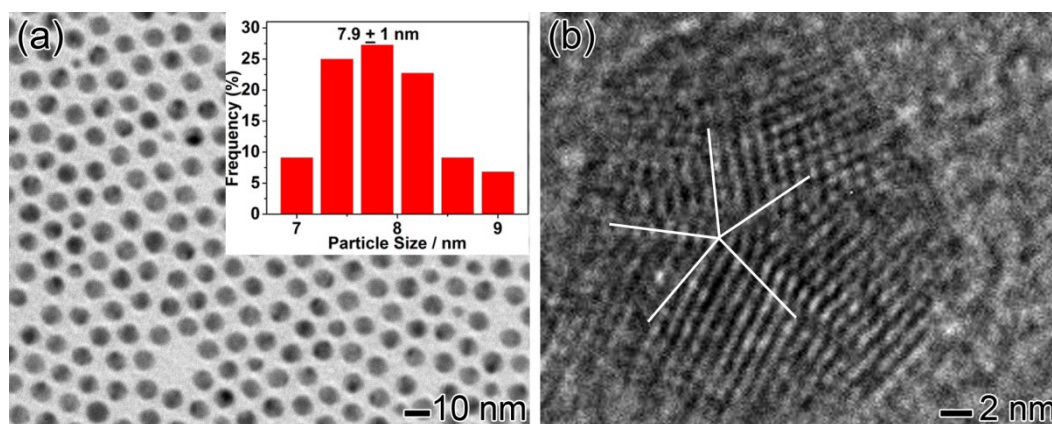

**Figure S1.** (a) TEM and (b) HRTEM images of the Au seeds. The inset in (a) corresponds to the size distribution.

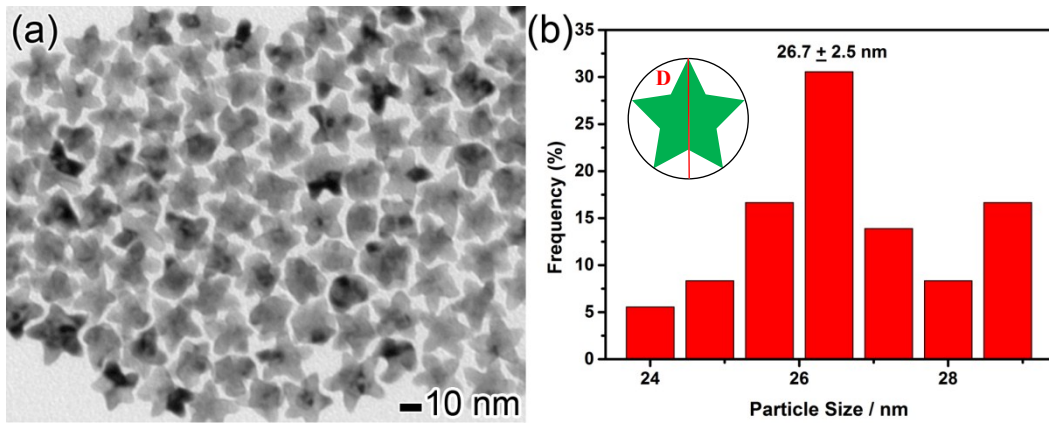

**Figure S2.** (a) TEM image of the Au@Pt<sub>1.2</sub>Cu nanostars and (b) the corresponding size distribution with a schematic illustration for the size definition of the nanostar.

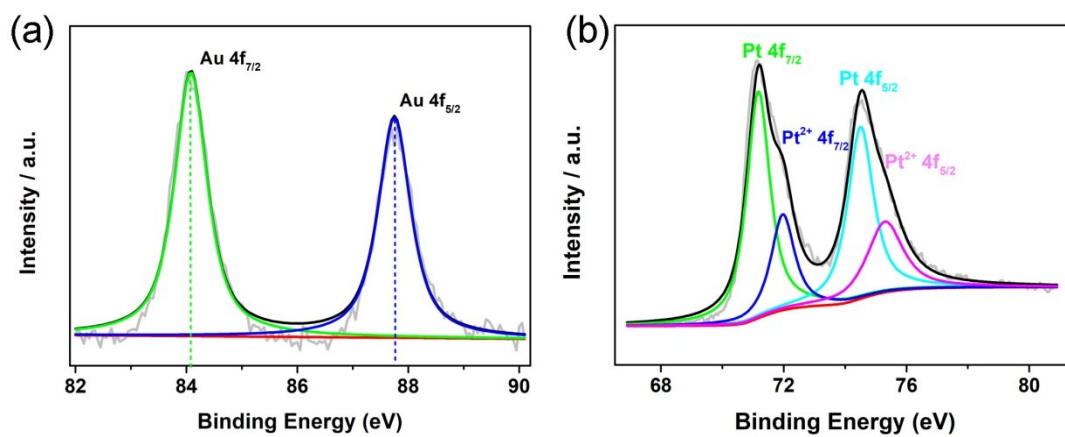

**Figure S3.** XPS spectra of the Au@Pt<sub>3</sub> NPs for (a) Au 4f and (b) Pt 4f orbitals, respectively.

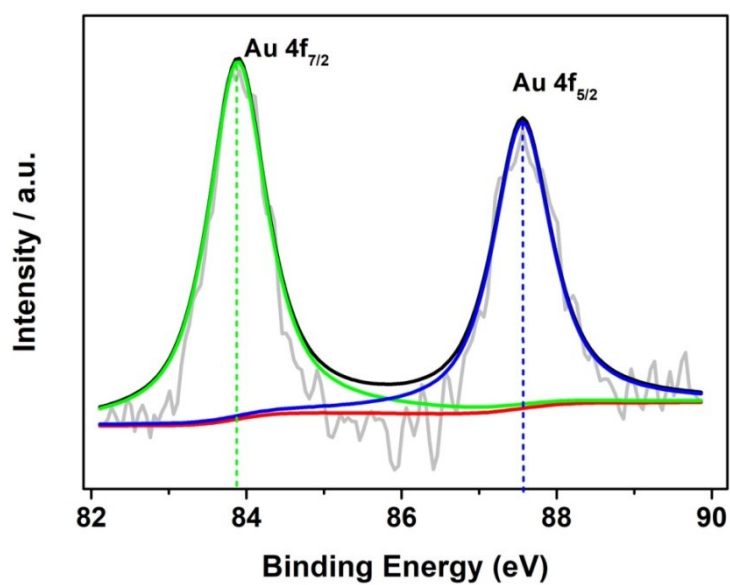

**Figure S4.** XPS spectra of Au@Pt<sub>1.2</sub>Cu nanostars for Au 4f orbital.

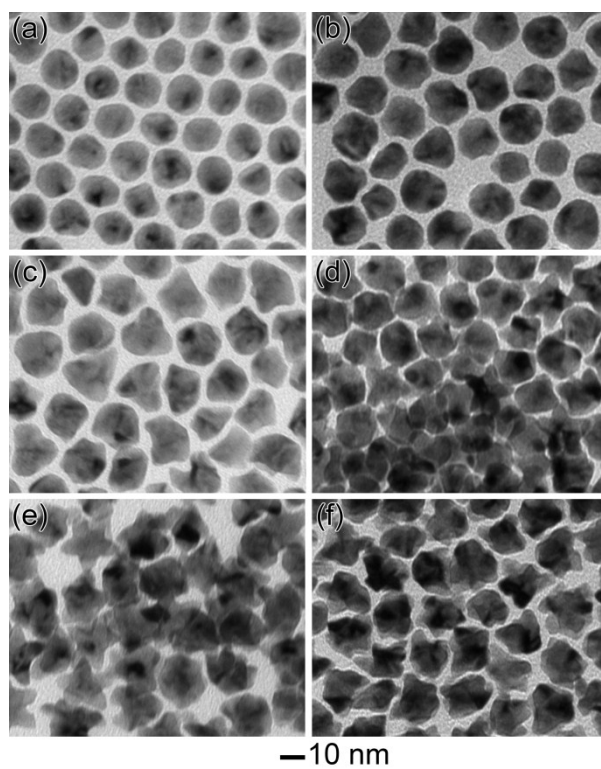

**Figure S5.** TEM images of Au@PtCu decahedra prepared using the standard procedure by maintaining the amount of Au seeds constant, except for the different Pt/Cu molar ratios fed in the synthesis: (a) 1/0.3, (b) 1/0.6, (c) 1/1, (d) 1/2, (e) 1/4, and (f) 1/5.

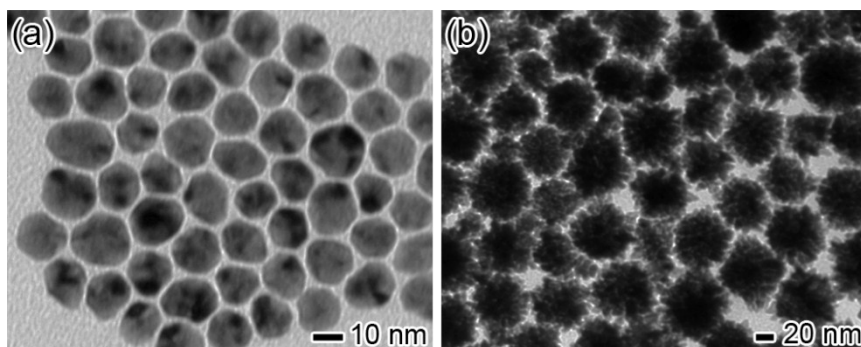

**Figure S6.** TEM images of (a) Au@Pt<sub>3</sub> NCs prepared in the absence of Cu precursors and (b) Pt<sub>1.2</sub>Cu nanobranched in the absence of Au seeds.

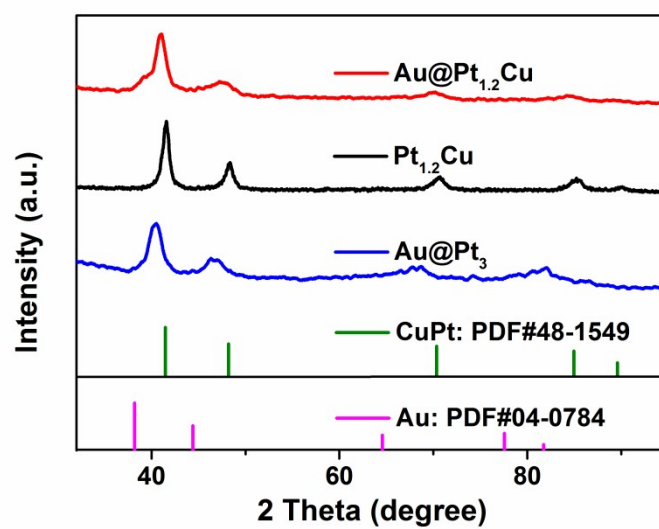

**Figure S7.** XRD patterns of Au@Pt<sub>1.2</sub>Cu nanostars, Au@Pt<sub>3</sub> NPs, and Pt<sub>1.2</sub>Cu nanobranched structures.



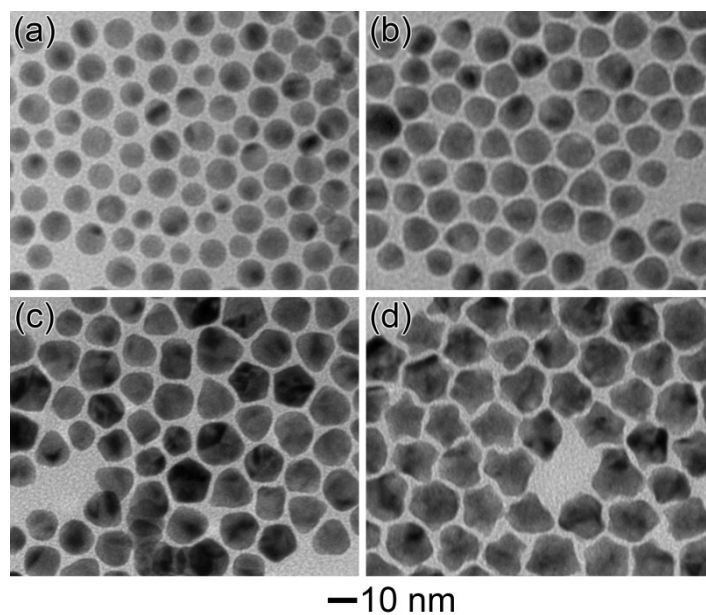

**Figure S8.** TEM images of Au@PtCu nanocrystals prepared using the standard procedure, except for the reaction temperature: (a) 160, (b) 180, (c) 200, and (d) 220 °C.

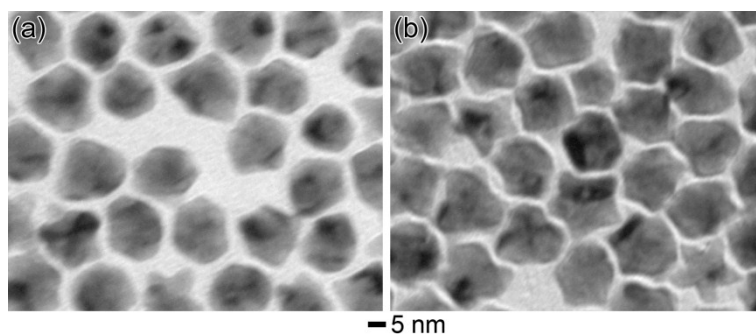

**Figure S9.** TEM images of Au@PtCu nanostars that were prepared using the standard procedure, except for the difference in the amounts of CTAB: (a) 0 and (b) 100 mg.

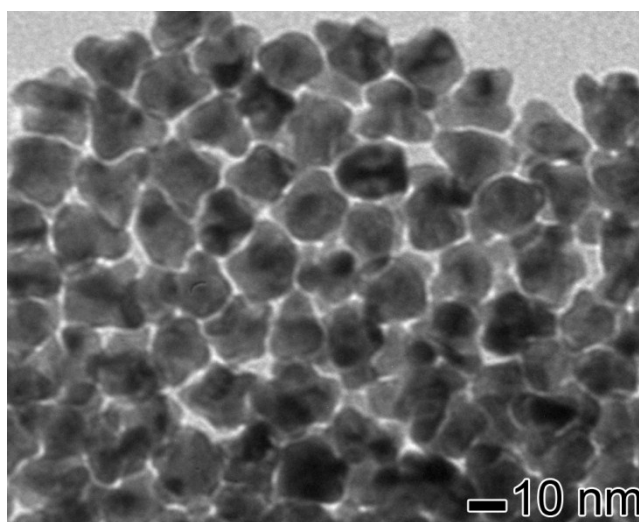

**Figure S10.** TEM image Au@PtCu nanostars prepared using the standard procedure except for using  $\text{NH}_4\text{Br}$  as the capping agent instead of CTAB.

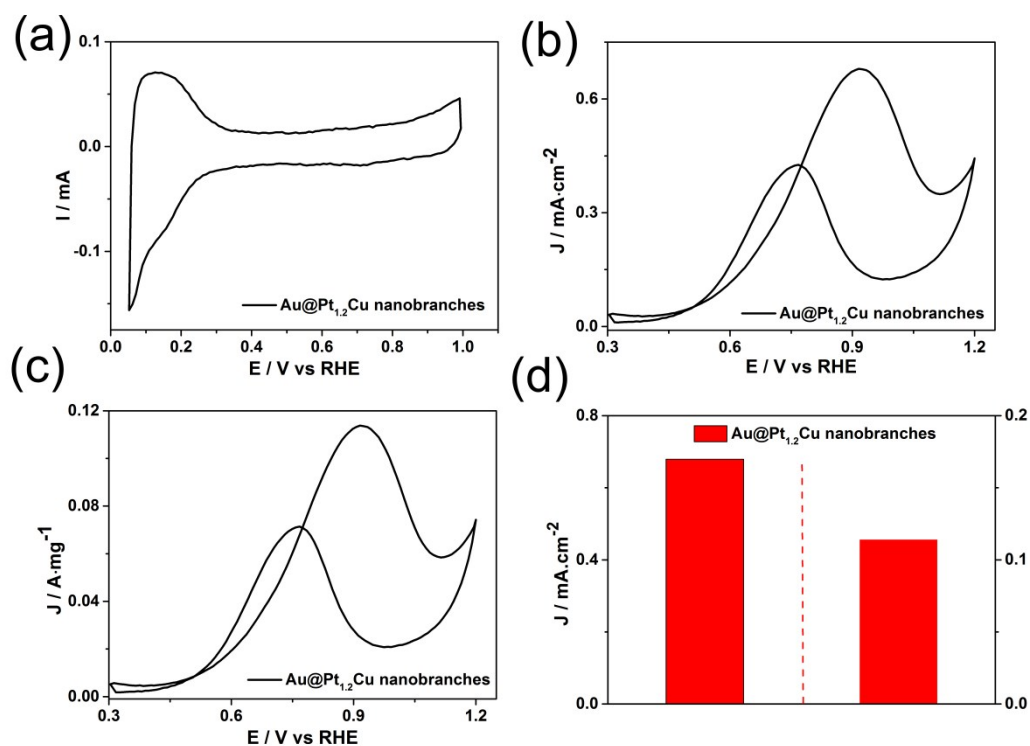

**Figure S11.** (a) Cyclic voltammograms (CVs) recorded at room temperature with a sweep rate of 50 mV s<sup>-1</sup> in N<sub>2</sub>-saturated 0.1 M HClO<sub>4</sub> for Au@Pt<sub>1.2</sub>Cu nanobranches. (b, c) CVs in a 0.1 M HClO<sub>4</sub> + 1 M CH<sub>3</sub>OH solution at a scan rate of 50 mV/s for MOR normalized by surface area ( $i_s$ , mA/cm<sup>2</sup><sub>Pt</sub>) and Pt mass ( $i_m$ , mA/μg<sub>Pt</sub>), respectively. (d) Specific and mass activities at the peak position of forward curve.

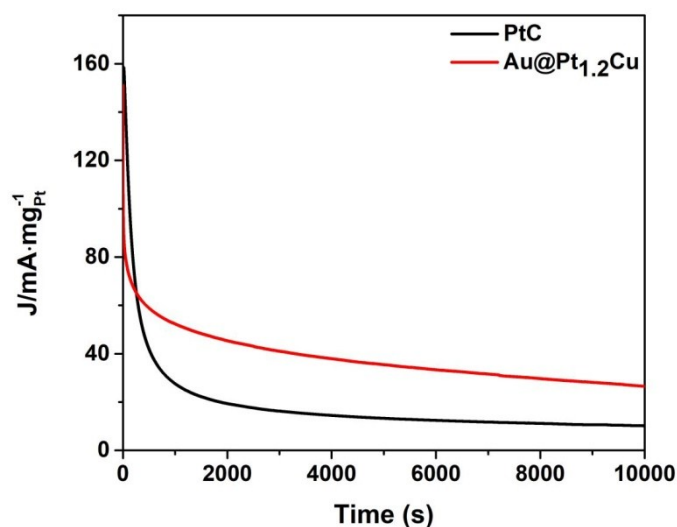

**Figure S12.** Chronoamperometric curves of Au@Pt<sub>1.2</sub>Cu nanostars and Pt/C obtained at 0.6 V for 10000 s.

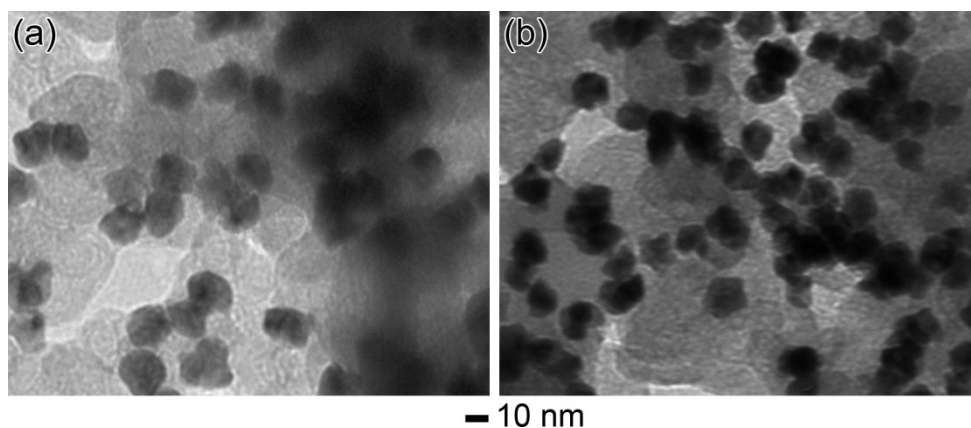

**Figure S13.** TEM images of the carbon-supported star-shaped Au@Pt<sub>1.2</sub>Cu catalysts (a) before and (b) after 1500 cycles CV tests.

## Reference

1. C. Z. Li, T. Y. Liu, T. He, B. Ni, Q. Yuan and X. Wang, *Nanoscale*, 2018, 10, 4670-4674.
2. Y. L. Xiong, Y. L. Ma, J. J. Li, J. B. Huang, Y. C. Yan, H. Zhang, J. B. Wu and D. Yang, *Nanoscale*, 2017, 31, 11077-11084.
3. D. H. Chen, Y. C. Zhao, X. L. Peng, X. Wang, W. J. Hu, C. Jing, S. S. Tian and J. N. Tian, *Electrochim. Acta*, 2015, 177, 86-92.
4. X. W. Du, S. P. Luo, H. Y. Du, M. Tang, X. D. Huang and P. K. Shen, *J. Mater. Chem. A*, 2016, 4, 1579-1589.
5. N. N. Dimitrova, M. W. Dhifallah, T. K. Mineva, T. Boiadjeva-Scherzer, H. Z. Guesmi and J. Georgieva, *RSC adv.*, 2019, 9, 2073-2080.
6. W. J. Kang, R. Li, D. H. Wei, S. L. Xu, S. Y. Wei and H. B. Li, *RSC Adv.*, 2015, 114, 94210-94215.
7. X. W. Liu, W. Y. Wang, H. Li, L. S. Li, G. B. Zhou, R. Yu, D. S. Wang and Y. D. Li, *Sci. Rep.*, 2013, 3, 1404.
8. K. Eid, H. J. Wang, P. He, K. M. Wang, T. Ahamad, S. M. Alshehri, Y. K. Yamauchi and L. Wang, *Nanoscale*, 2015, 7, 16860-16866.
